# Supplementary material for: Bavachin Rejuvenates Sensitivity of Colistin against Colistin-Resistant Gram-Negative Bacteria
Source: MDPI journal article supplement (doi:10.3390/ijms25042349), 2024-02-16
Supplement: s1 [file s1]

## **Bavachin rejuvenates sensitivity of colistin against colistin-resistant Gram-negative bacteria**

Jie Li <sup>a, c</sup>, Ning Han <sup>a, c</sup>, Zhengyuan He <sup>a, b</sup>, Xiaolan Dai <sup>a, b</sup>, Feifei Zhao <sup>b, c</sup>, Yangyang Li <sup>b</sup>, Wenguang Xiong <sup>c</sup>, Zhenling Zeng <sup>a, c</sup> \*

a Guangdong Provincial Key Laboratory of Veterinary Pharmaceutics Development and Safety Evaluation, College of Veterinary Medicine, South China Agricultural University, Guangzhou 510642, China.

b National Laboratory of Safety Evaluation (Environmental Assessment) of Veterinary Drugs, South China Agricultural University, Guangzhou 510642, China.

c National Risk Assessment Laboratory for Antimicrobial Resistance of Animal Original Bacteria, South China Agricultural University, Guangzhou 510642, China.

\*Corresponding author: Zhenling Zeng

E-mail: zlzeng@scau.edu.cn

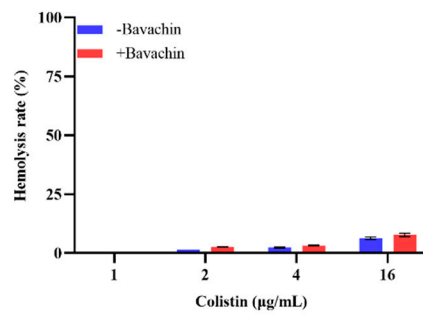

**Figure S1** Hemolytic activity of colistin (1, 2, 4 and 16 µg/mL) in the absence or presence of 32 µg/mL bavachin. Triton X-100 and PBS were used as positive control and negative control, respectively.

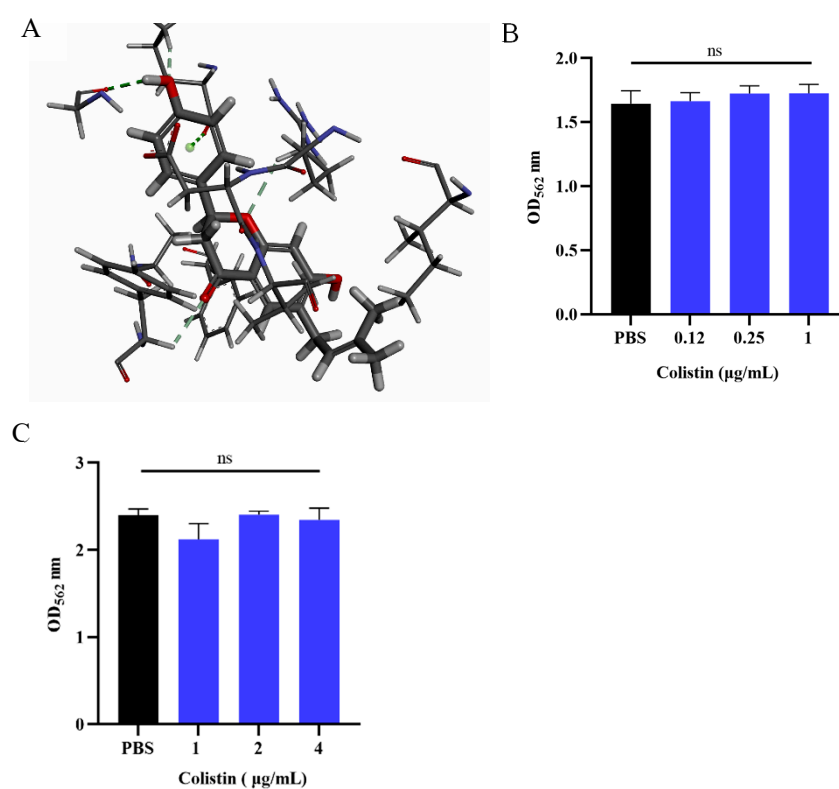

**Figure S2** Synergistic antibacterial mechanism of bavachin combined with colistin against Gram-negative bacteria.

(A) The potential binding mode of bavachin and colistin by molecular docking.

(B) and (C) Bacterial protein leakage of *E. coli* ATCC 25922 (B) and *E. coli* SHP45 (C) after treatment with different concentrations of colistin in the presence of 32 µg/mL bavachin for 6 h.

**Table S1** The MIC values of bavachin and colistin against Gram-negative bacteria

| strain                             | <i>mcr</i> gene | MIC (µg/mL) |          | FICI  |
|------------------------------------|-----------------|-------------|----------|-------|
|                                    |                 | colistin    | bavachin |       |
| <i>E. coli</i> ATCC25922           | negative        | 0.25        | > 128    | 0.125 |
| <i>E. coli</i> SHP45               | positive        | 4           | > 128    | 0.125 |
| <i>E. coli</i> GDQ8D147            | negative        | 8           | > 128    | 0.25  |
| <i>E. coli</i> GDQ8P27             | positive        | 4           | > 128    | 0.25  |
| <i>P. multocida</i><br>CVCC434     | negative        | 0.5         | > 128    | 0.125 |
| <i>K. pneumoniae</i> 212           | negative        | 4           | > 128    | 0.125 |
| <i>K. pneumoniae</i><br>ATCC700603 | negative        | 0.5         | > 128    | 0.25  |
| <i>S. typhimurium</i><br>26FS14    | positive        | 2           | > 128    | 0.125 |
| <i>S. typhimurium</i> S226         | positive        | 2           | > 128    | 0.125 |
| <i>S. typhimurium</i><br>ATCC14028 | negative        | 0.25        | > 128    | 0.25  |

**Table S2** The qRT-PCR primer used in this study

| Primer names | Sequence (5' to 3')        | Size (bp) |
|--------------|----------------------------|-----------|
| mcr-1 -F     | AAAGACGCGGTACAAGCAAC       | 213       |
| mcr-1-R      | GCTGAACATACACGGCACAG       |           |
| 16s- F       | TCCTACGGGAGGCAGCAGT        | 467       |
| 16s -R       | GGACTACCAGGGTATCTAATCCTGTT |           |
